# Supplementary material
Source: PubMed Central journal article supplement (PMC6885614)
Supplement: supp_RA119.009782_153506_1_supp_409629_pz69p6.pdf [file supp_RA119.009782_153506_1_supp_409629_pz69p6.pdf]

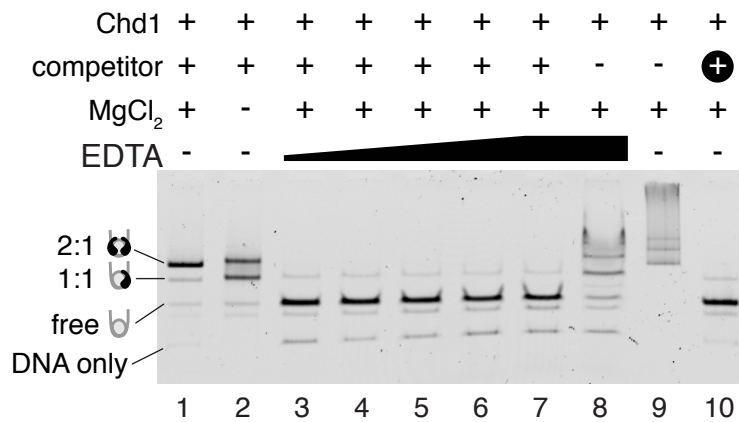

### Supplementary Figure 1.

#### Pre-incubation with EDTA disrupts Chd1-nucleosome complexes in the presence of competitor nucleosome.

To determine how much EDTA would be sufficient for preventing formation of a stable complex in  $\text{ADP}\cdot\text{BeF}_3^-$ , Chd1 (40 nM) was added to 40N40 FAM-labeled nucleosomes (10 nM) in the presence of 1 mM ADP, 1.2 mM  $\text{BeCl}_2$ , and 6 mM NaF, either without (lane 2) or with 2.5 mM  $\text{MgCl}_2$ . The concentrations of EDTA used ranged from 62.5 mM (lane 3) to 300 mM (lanes 7 and 8). For all EDTA concentrations, Chd1 failed to remain bound to nucleosomes above background levels, consistent with the EDTA chelating all free  $\text{Mg}^{2+}$  necessary for a stable Chd1-nucleosome complex. Competitor 26N33 nucleosome (1  $\mu\text{M}$ ) was added to FAM-40N40 nucleosomes either before the addition of Chd1 (lane 10, negative control, black circle), or after a 2 hr incubation of Chd1 with FAM-40N40 nucleosomes as indicated. Species were resolved on 3.5% native polyacrylamide gels. Reactions for lanes 1-7 were loaded onto gels after 2 min incubation with competitor.
